# Supplementary material for: Combination Treatment Targeting mTOR and MAPK Pathways Has Synergistic Activity in Multiple Myeloma
Source: MDPI journal article supplement (doi:10.3390/cancers15082373), 2023-04-19
Supplement: s1 [file s1]

**Figure S1.**

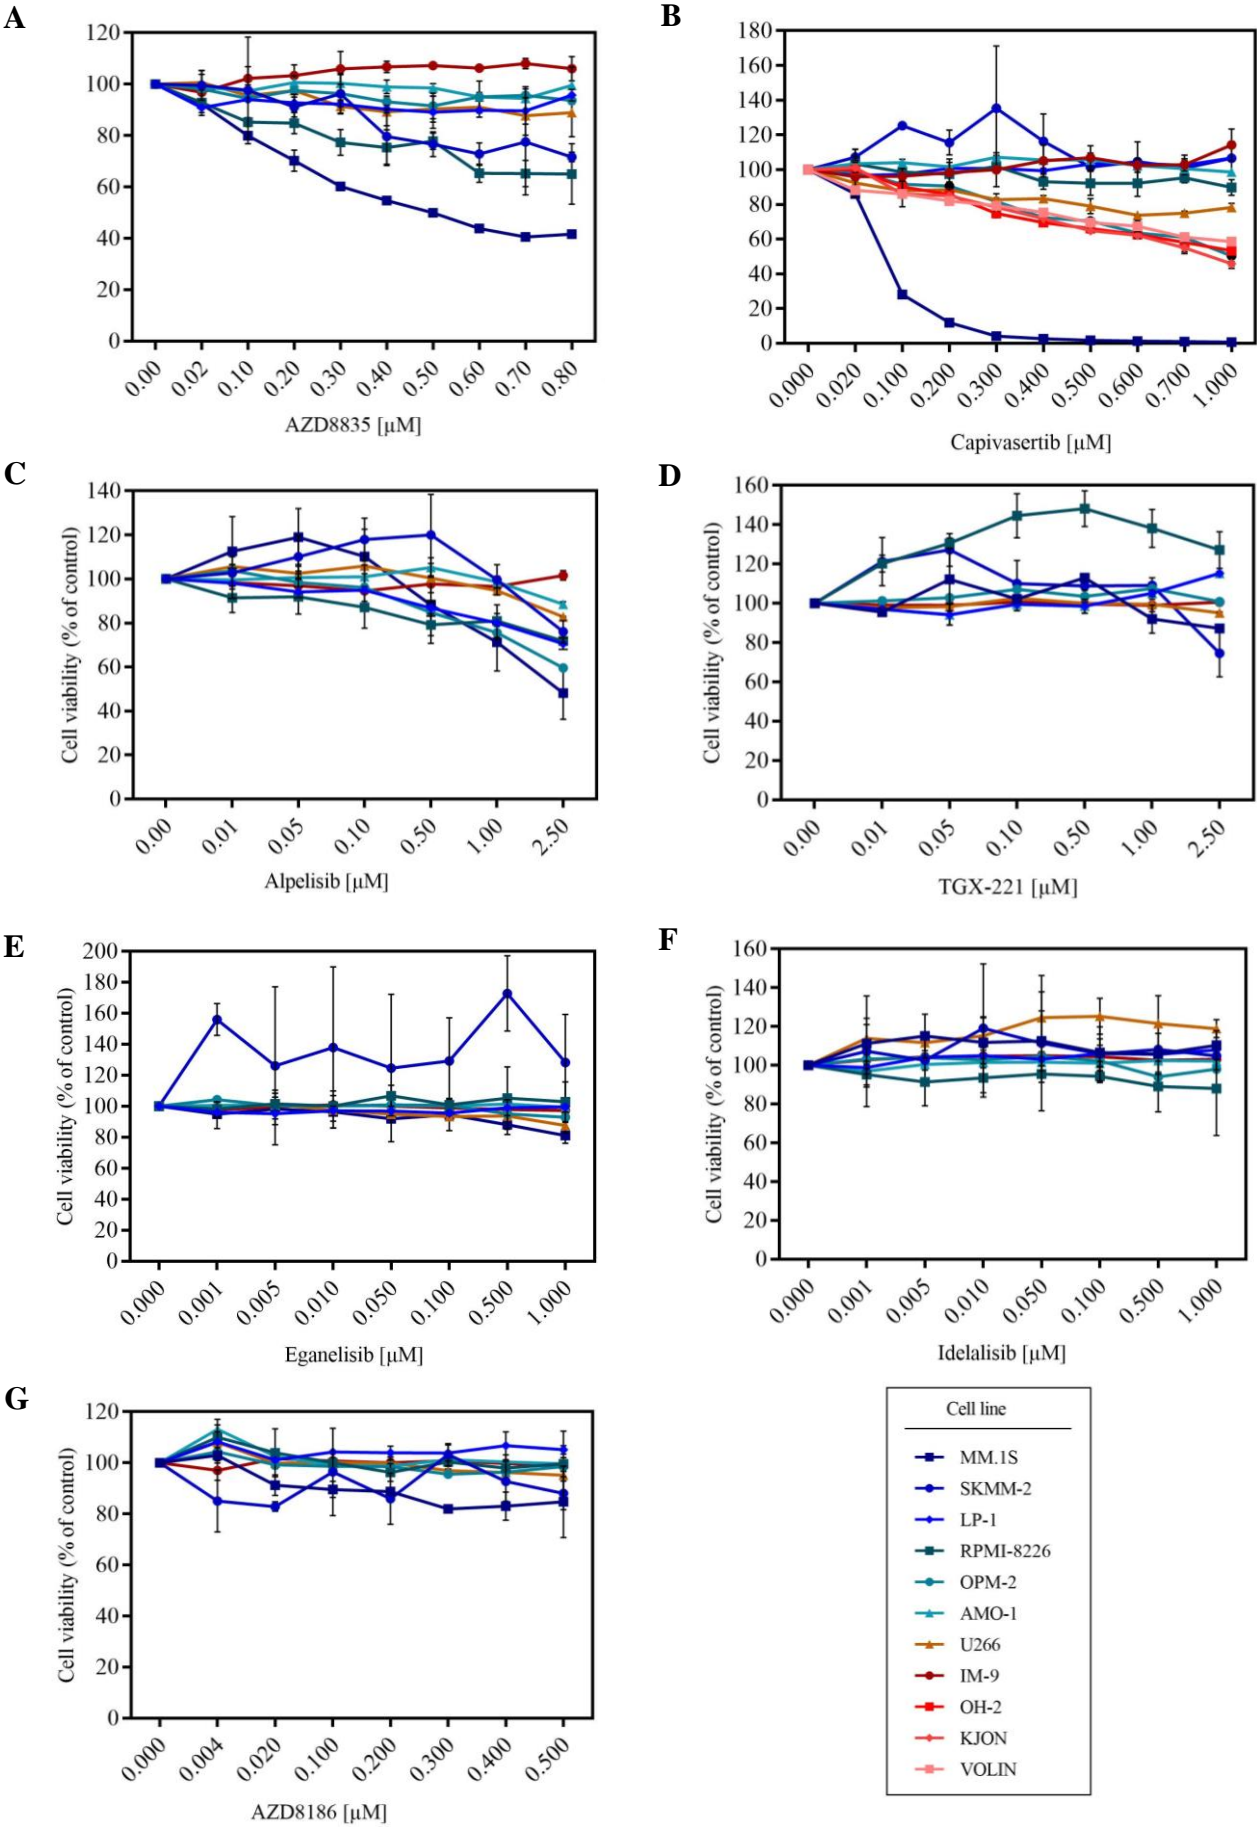

**Figure S1.** Different sensitivities of MM cell lines to PI3K isoforms and AKT inhibitors (A) MM cell lines were incubated for 5 days with PI3K $\alpha/\delta$  inhibitor AZD8835. Viable cells were determined. Representative result from at least 3 independent experiments is shown. Error bars indicate standard deviations. (B) MM cell lines were incubated for 5 days with AKT inhibitor capivasertib. Viable cells were determined. Representative result from at least 3 independent experiments is shown. Error bars indicate standard deviations. (C) MM cell lines were incubated for 5 days with PI3K $\alpha$  inhibitor alpelisib. Viable cells were determined. Representative result from at least 3 independent experiments is shown. Error bars indicate standard deviations. (D) MM cell lines were incubated for 5 days with PI3K $\beta$  inhibitor TGX-221. Viable cells were determined. Representative result from at least 3 independent experiments is shown. Error bars indicate standard deviations. (E) MM cell lines were incubated for 5 days with PI3K $\gamma$  inhibitor eganelisib. Viable cells were determined. Representative result from at least 3 independent experiments is shown. Error bars indicate standard deviations. (F) MM cell lines were incubated for 5 days with PI3K $\delta$  inhibitor idelalisib. Viable cells were determined. Representative result from at least 3 independent experiments is shown. Error bars indicate standard deviations. (G) MM cell lines were incubated for 5 days with PI3K $\beta/\delta$  inhibitor AZD8186. Viable cells were determined. Representative result from at least 3 independent experiments is shown. Error bars indicate standard deviations.

**Figure S2.**

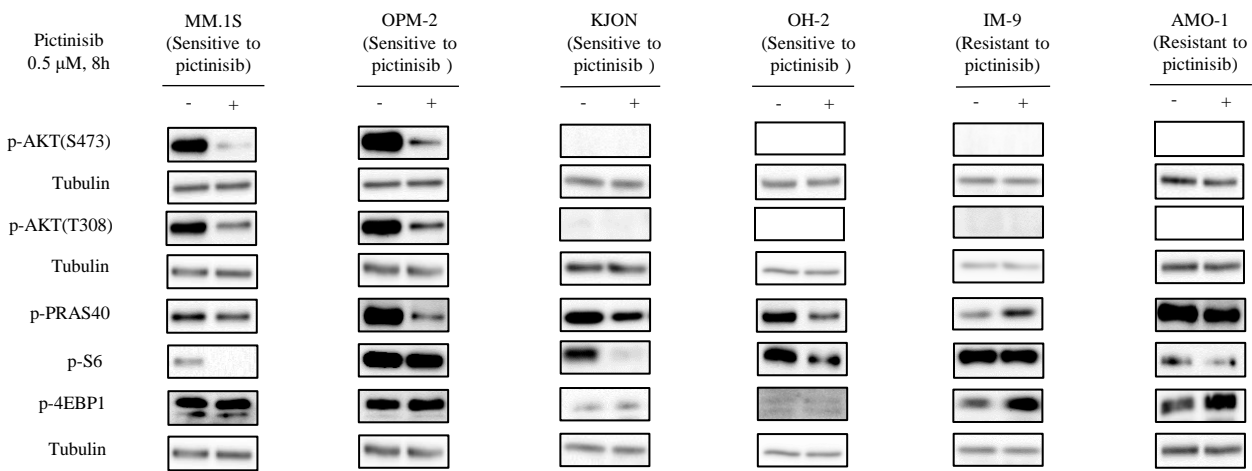

**Figure S2.** Pictinisib is poorly active *in vitro*. Treatment with 0.5  $\mu$ M pictinisib for 8 hours resulted in partially decreased phosphorylation of PI3K downstream molecules in MM.1S, OPM-2, KJON, and OH-2 cell lines. No downregulation could be observed in IM-9 and AMO-1 cell lines. Tubulin was the loading control. These results are representative of three separate experiments.

Figure S3.

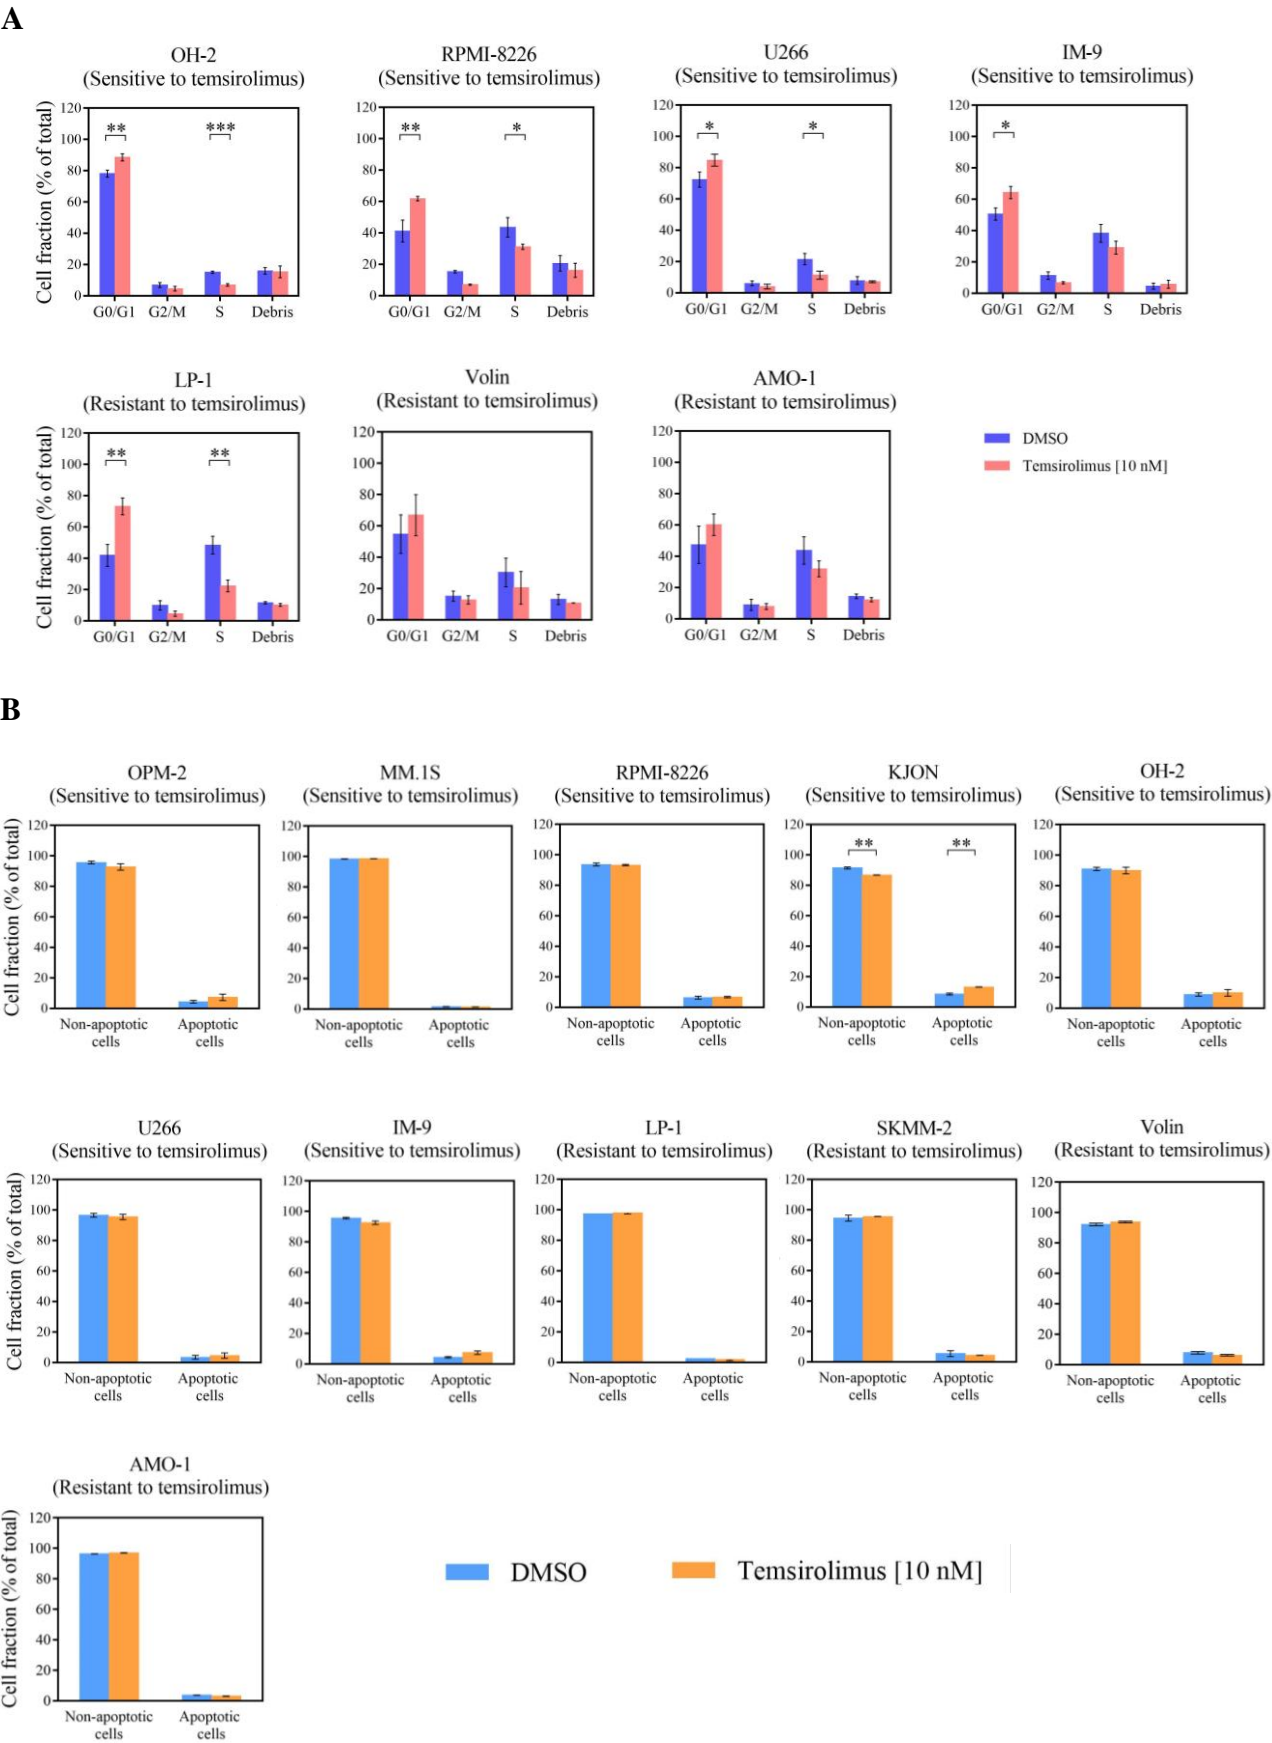

**Figure S3.** mTOR inhibitor treatments in MM cell lines **(A)** Temsirolimus treatment induced cell cycle arrest. 24 hours of inhibitor treatment resulted in an increase of G<sub>0</sub>/G<sub>1</sub> stage in OH-2, RPMI-8226, U266, LP-1, and IM-9 cell lines. Data are expressed as means  $\pm$  standard deviation of at least 3 independent experiments. Error bars indicate standard deviations.  $P^* \leq 0.05$ ,  $P^{**} \leq 0.01$ ,  $P^{***} \leq 0.001$ . **(B)** 48 hours of temsirolimus treatment did not induce a significant increase of apoptosis in MM cell lines except for KJON cell line. Representative results of 3 independent experiments are shown. Error bars indicate standard deviations.  $P^{**} \leq 0.01$ .

Figure S4.

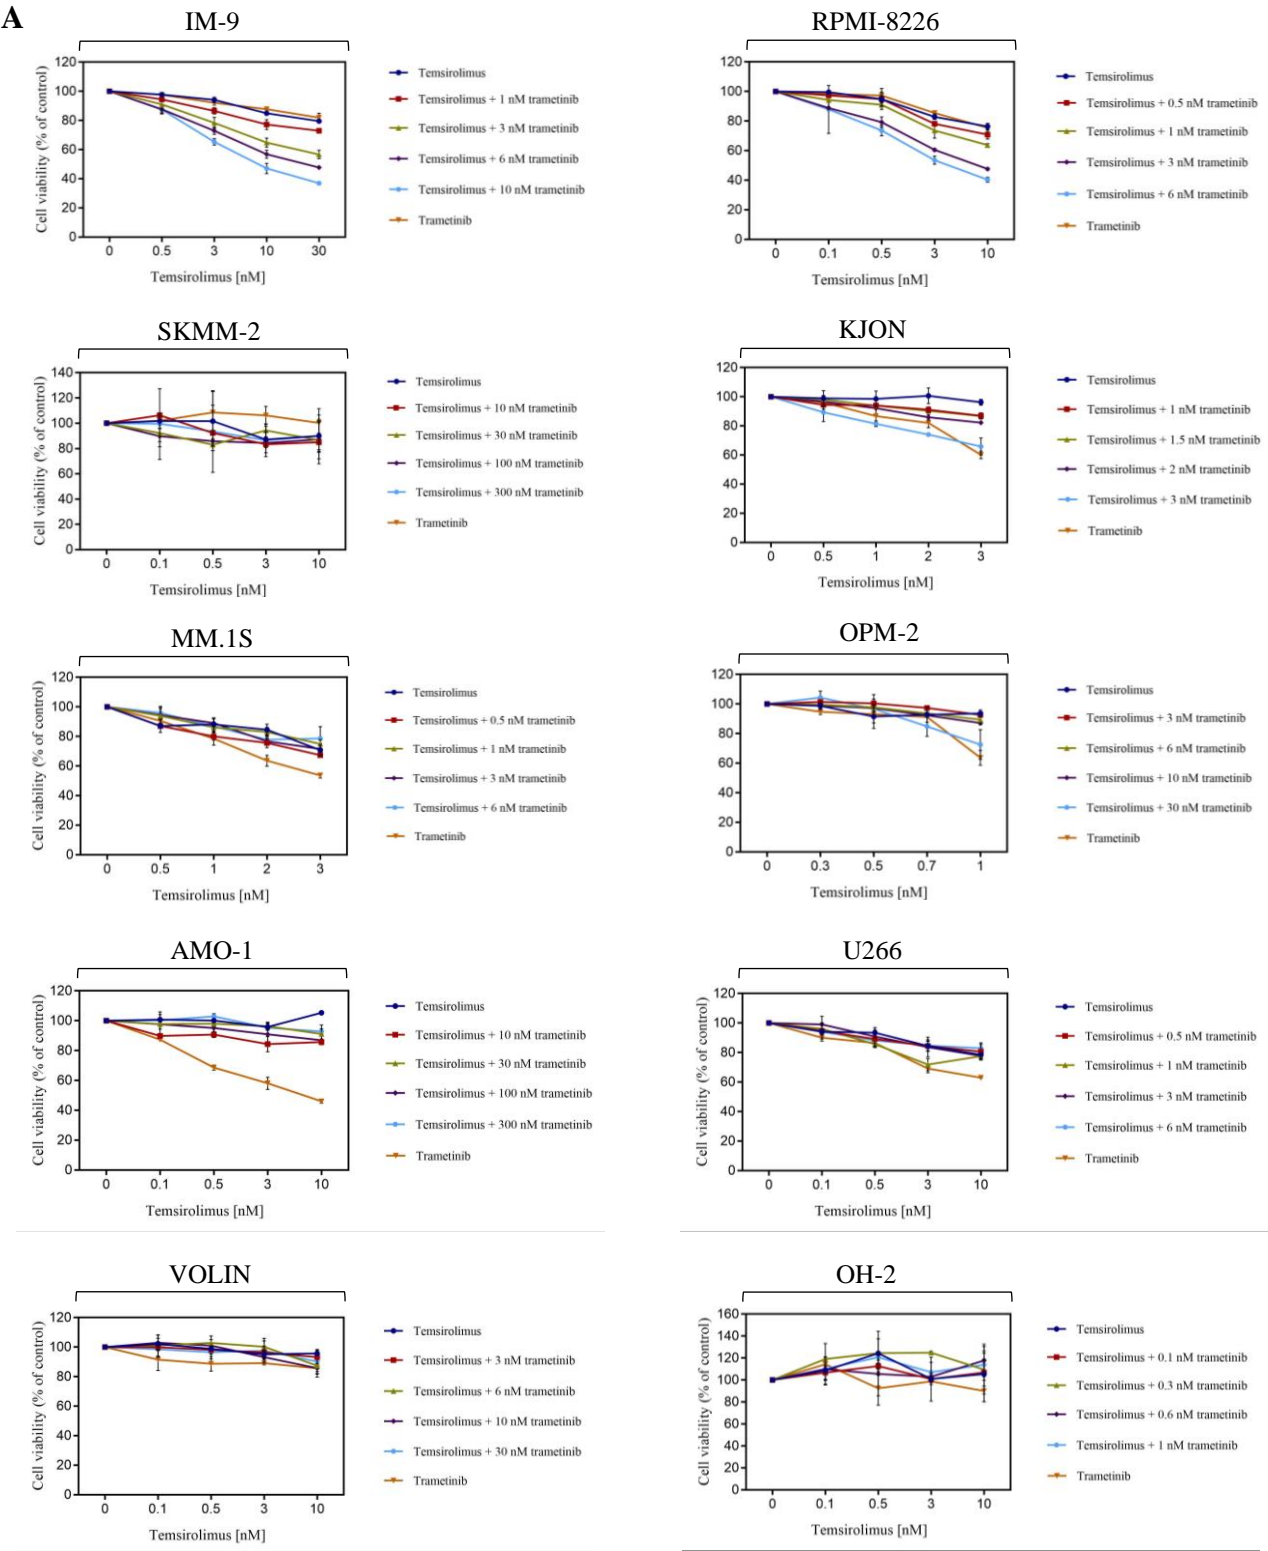

Figure S4.

B

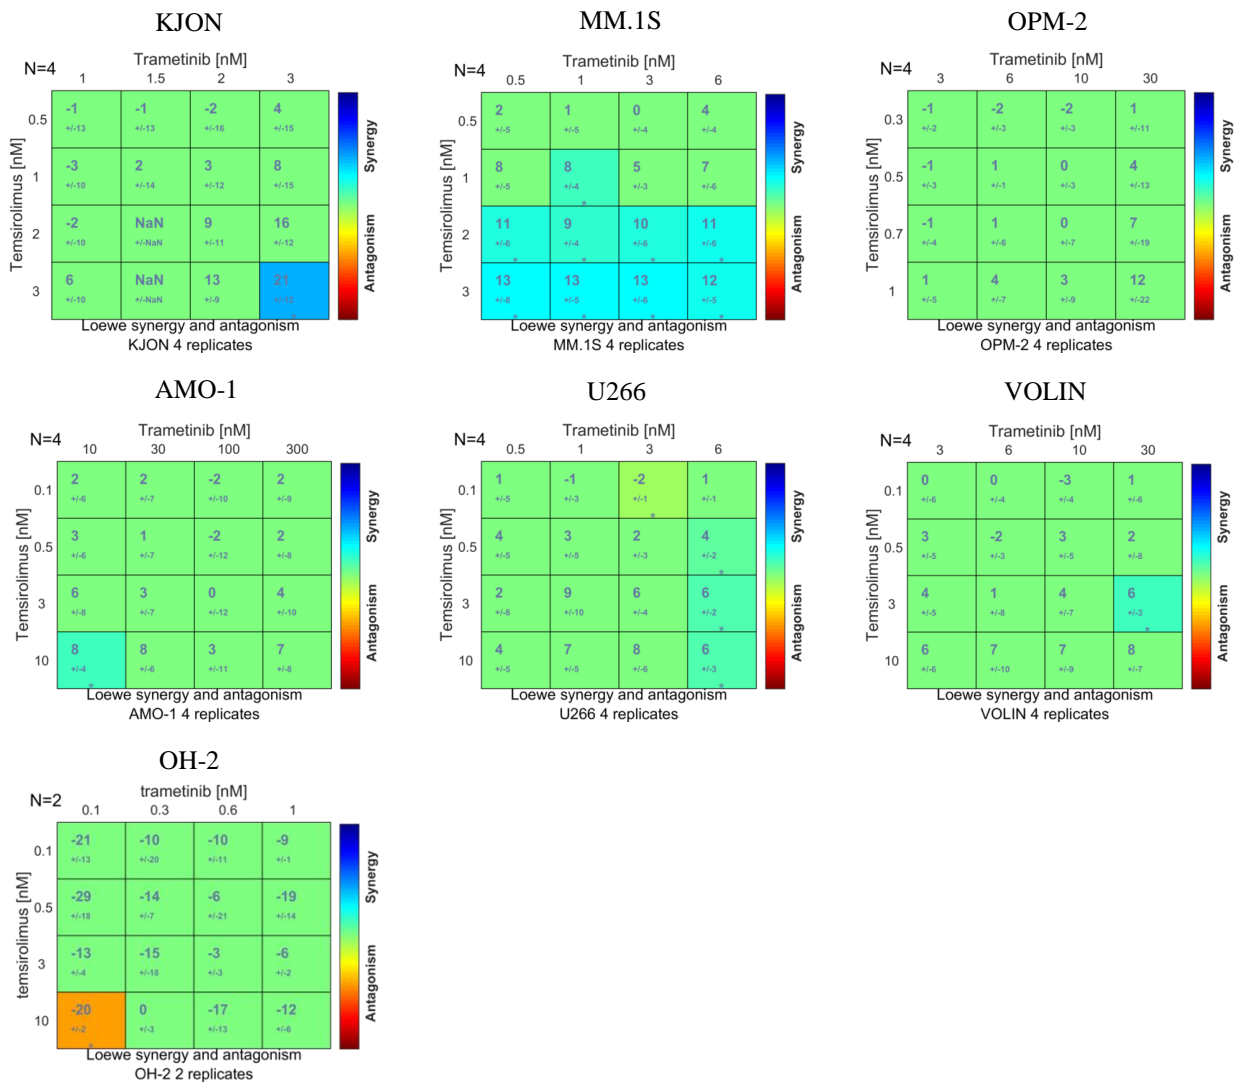

C

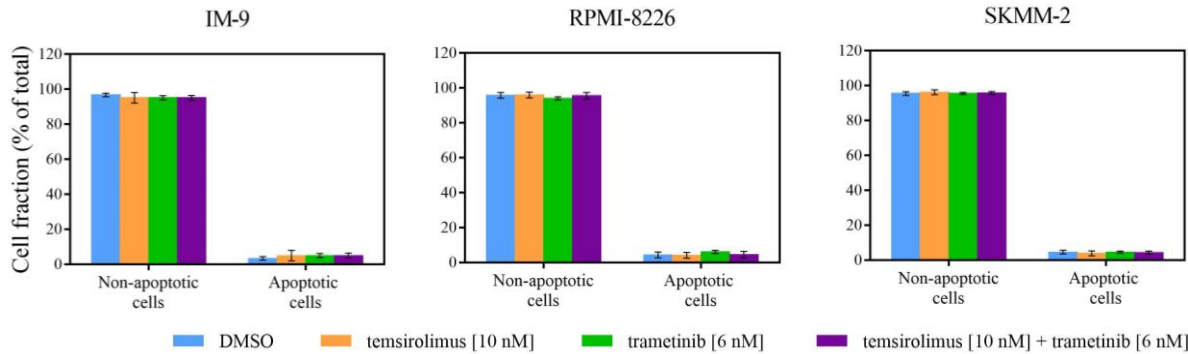

D

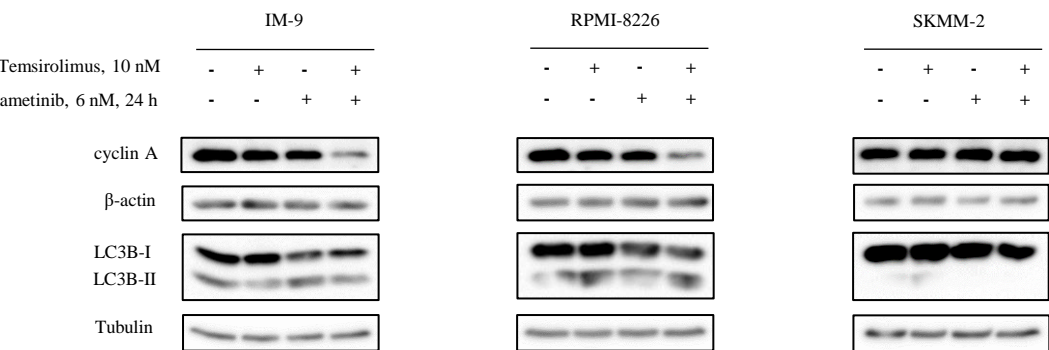

**Figure S4.**

**E**

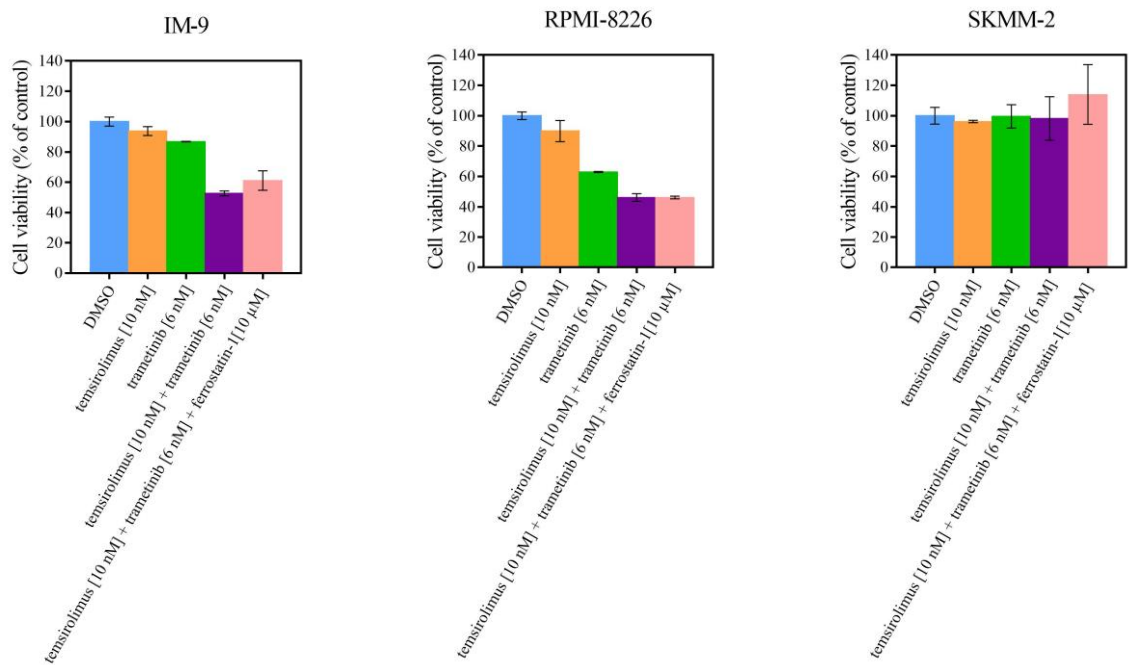

**Figure S4.** Temsirolimus and trametinib act synergistically in MM cell lines. **(A)** Temsirolimus and trametinib combination treatment in 10 MM cell lines. MM cell lines were incubated for 5 days with mTOR inhibitor temsirolimus and MEK inhibitor trametinib. Viable cells were determined. Representative results from at least 3 independent experiments are shown. Error bars indicate standard deviations. **(B)** Synergy score matrix for temsirolimus and trametinib combination treatment in 7 MM cell lines. **(C)** Apoptosis following treatment with either vehicle control, temsirolimus alone, trametinib alone, or with both temsirolimus and trametinib. Combined inhibitor treatment with temsirolimus and trametinib did not induce an increase of apoptosis in IM-9, RPMI-8226, and SKMM-2 cell lines compared with either temsirolimus or trametinib alone. Representative results of 3 independent experiments are shown. Error bars indicate standard deviations. **(D)** Western Blotting following treatment with either vehicle control, temsirolimus alone, trametinib alone, or with both temsirolimus and trametinib. Combined inhibitor treatment with temsirolimus and trametinib decreased the level of cyclin A in IM-9 and RPMI-8226 cell lines but not in SKMM-2 cell line compared with either temsirolimus or trametinib alone after 24 hours. Combination treatment did not increase the level of LC3B-II in IM-9, RPMI-8226, and SKMM-2 cell lines.  $\beta$ -actin and tubulin were the loading control. Representative results of 3 independent experiments are shown. **(E)** Anti-ferroptosis rescue following treatment with temsirolimus and trametinib. MM cell lines were incubated for 5 days with mTOR inhibitor temsirolimus, MEK inhibitor trametinib, and ferroptosis inhibitor ferrostatin-1. Viable cells were determined. The addition of ferrostatin-1 failed to rescue the survival of IM-9, RPMI-8226, and SKMM-2 cell lines after combination treatment with temsirolimus and trametinib. Representative results of 2 independent experiments are shown.



**Figure S5.**

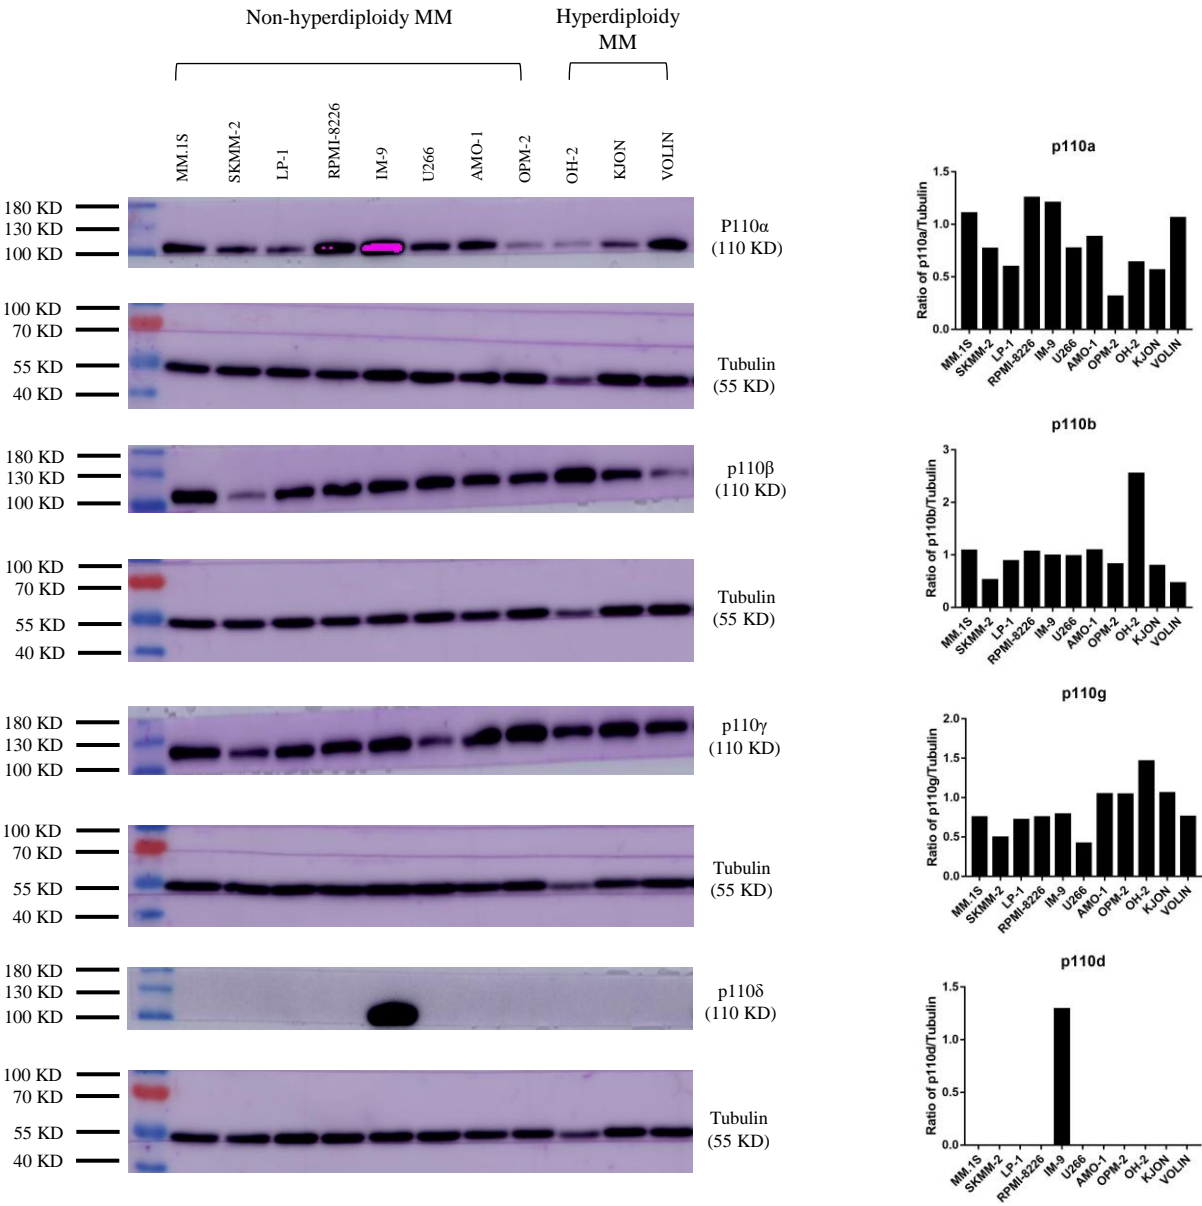

**Figure S5.** Original Western Blots for Figure 1A. Protein band densitometric analysis was performed by ImageJ software and is shown next to each blot.

**Figure S6.**

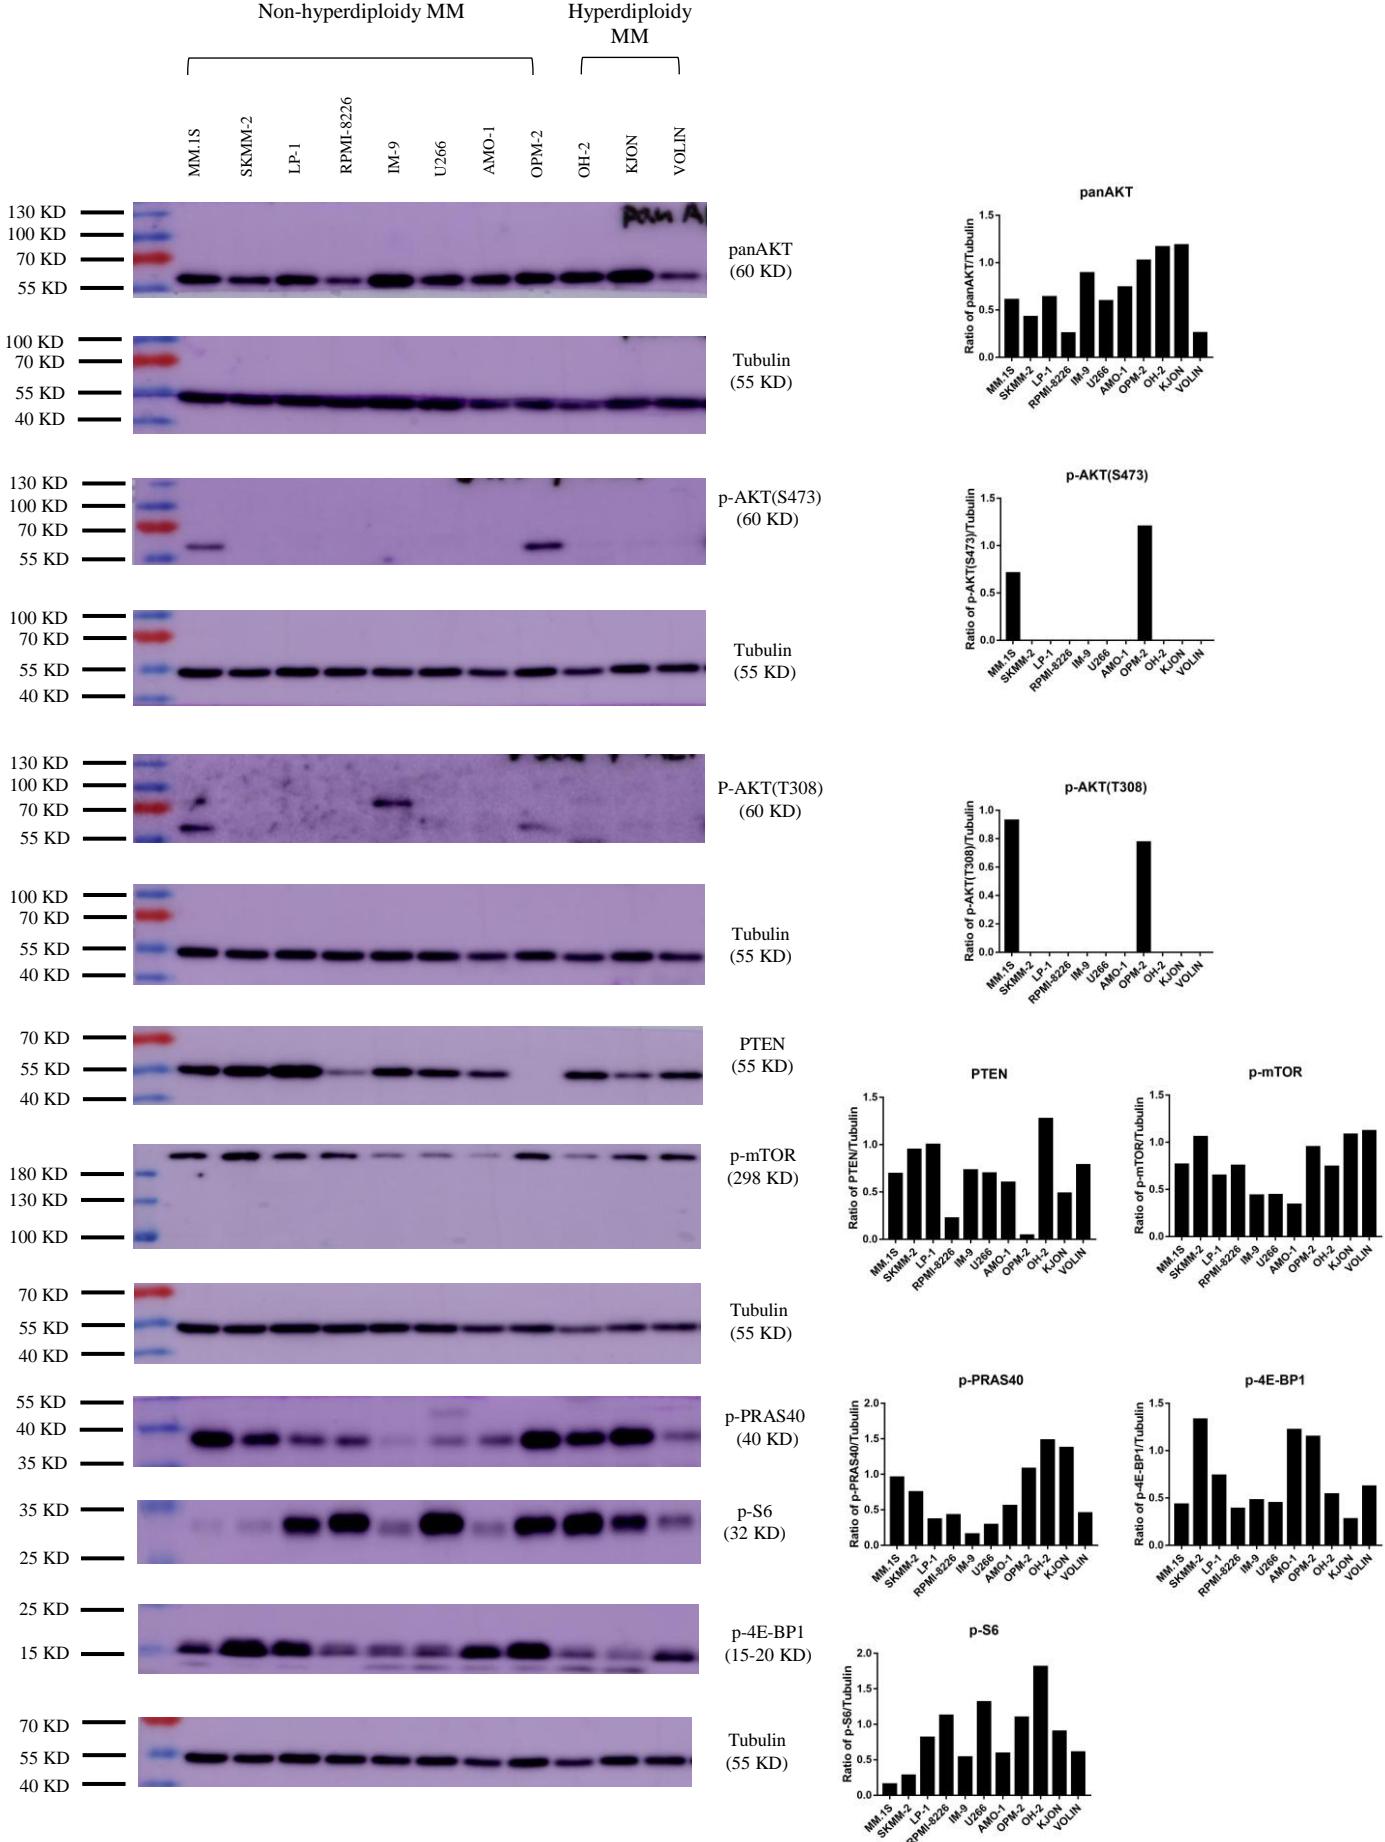

**Figure S6.** Original Western Blots for Figure 1B. Protein band densitometric analysis was performed by ImageJ software and is shown next to each blot.

**Figure S7.**

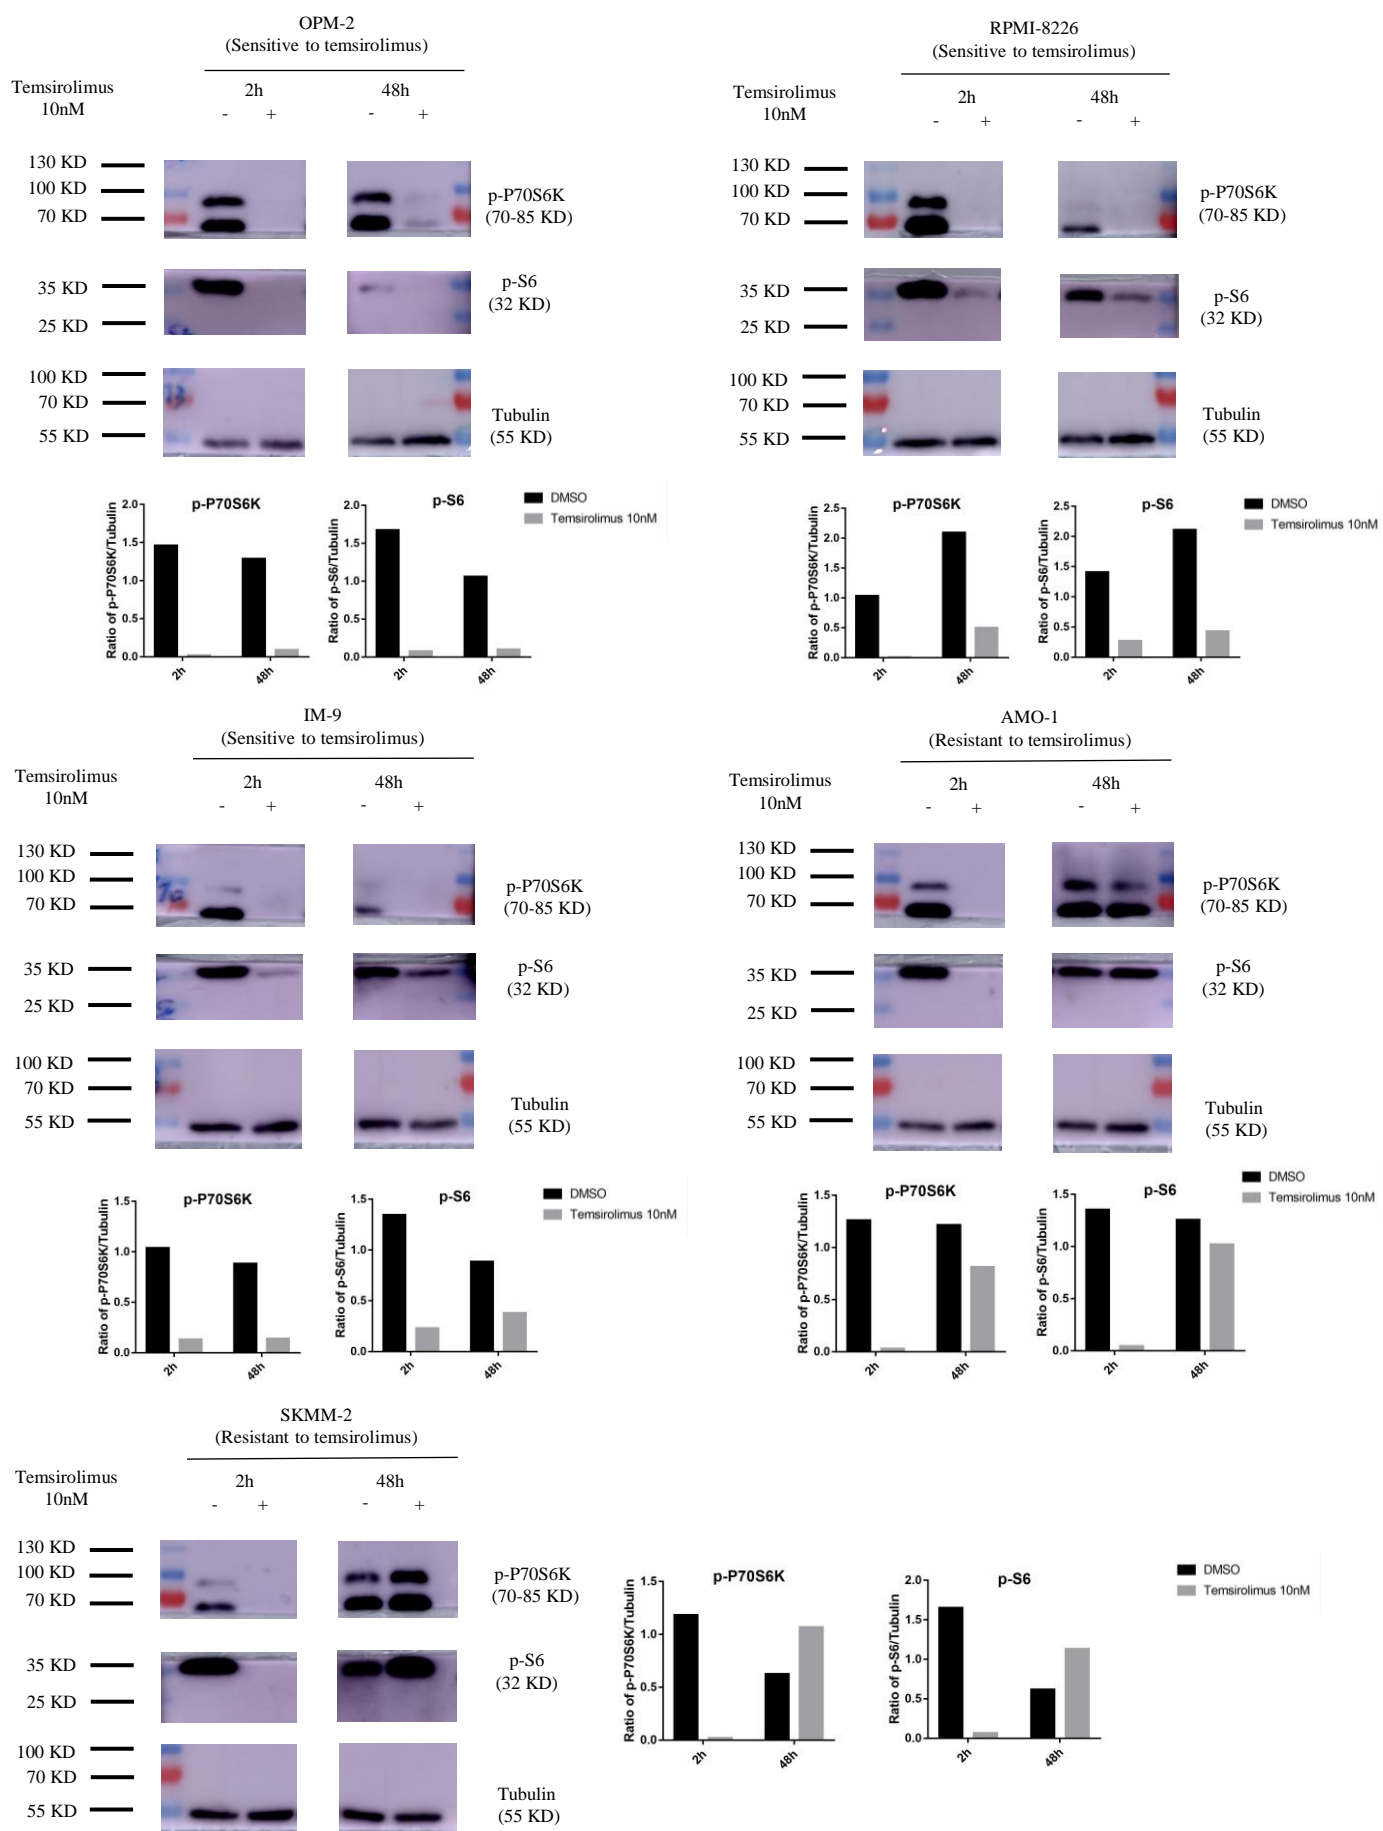

**Figure S7.** Original Western Blots for Figure 2A. Protein band densitometric analysis was performed by ImageJ software and is shown next to each blot.

Figure S8.

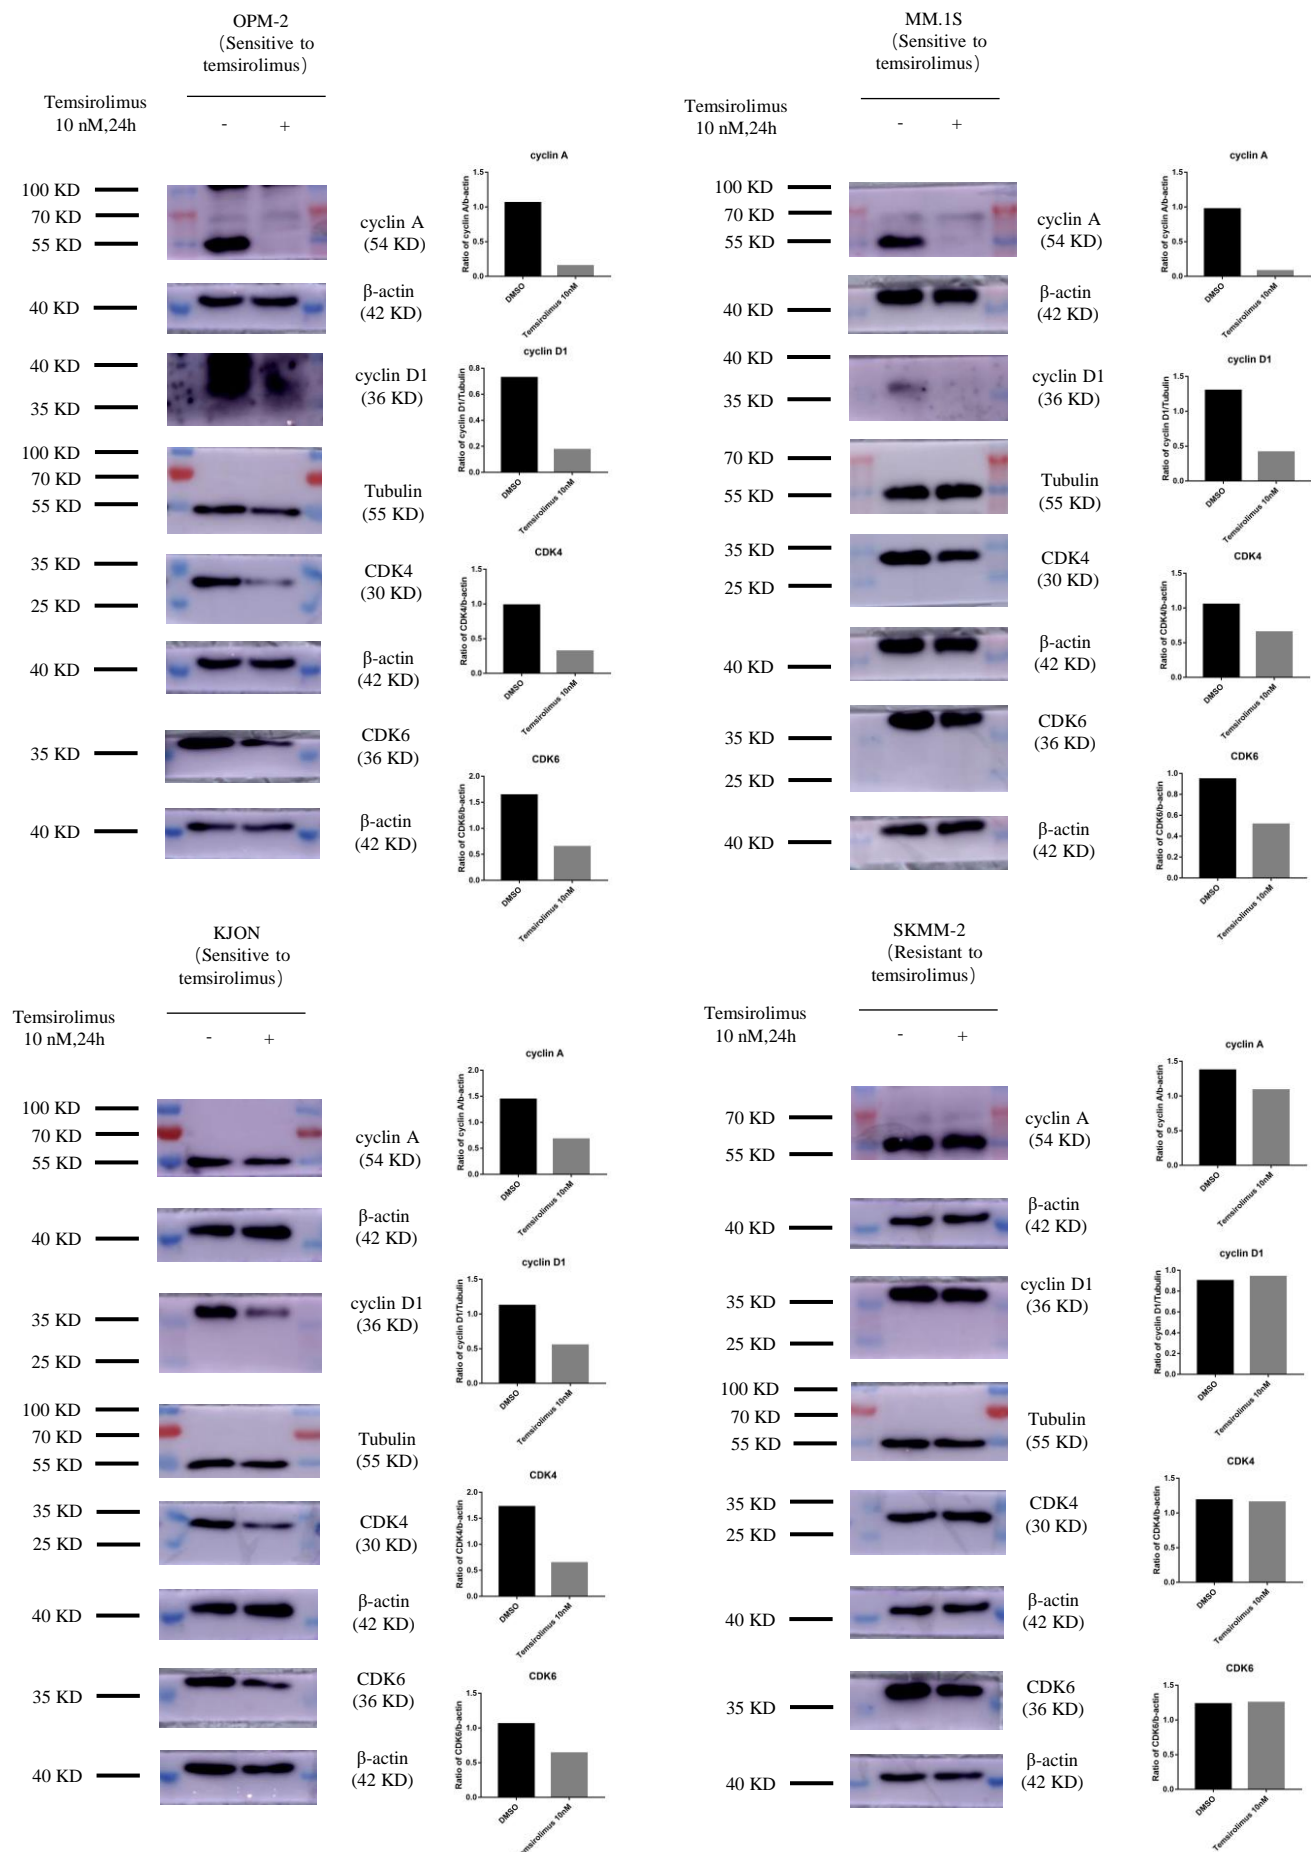

Figure S8. Original Western Blots for Figure 2C. Protein band densitometric analysis was performed by ImageJ software and is shown next to each blot.

**Figure S9.**

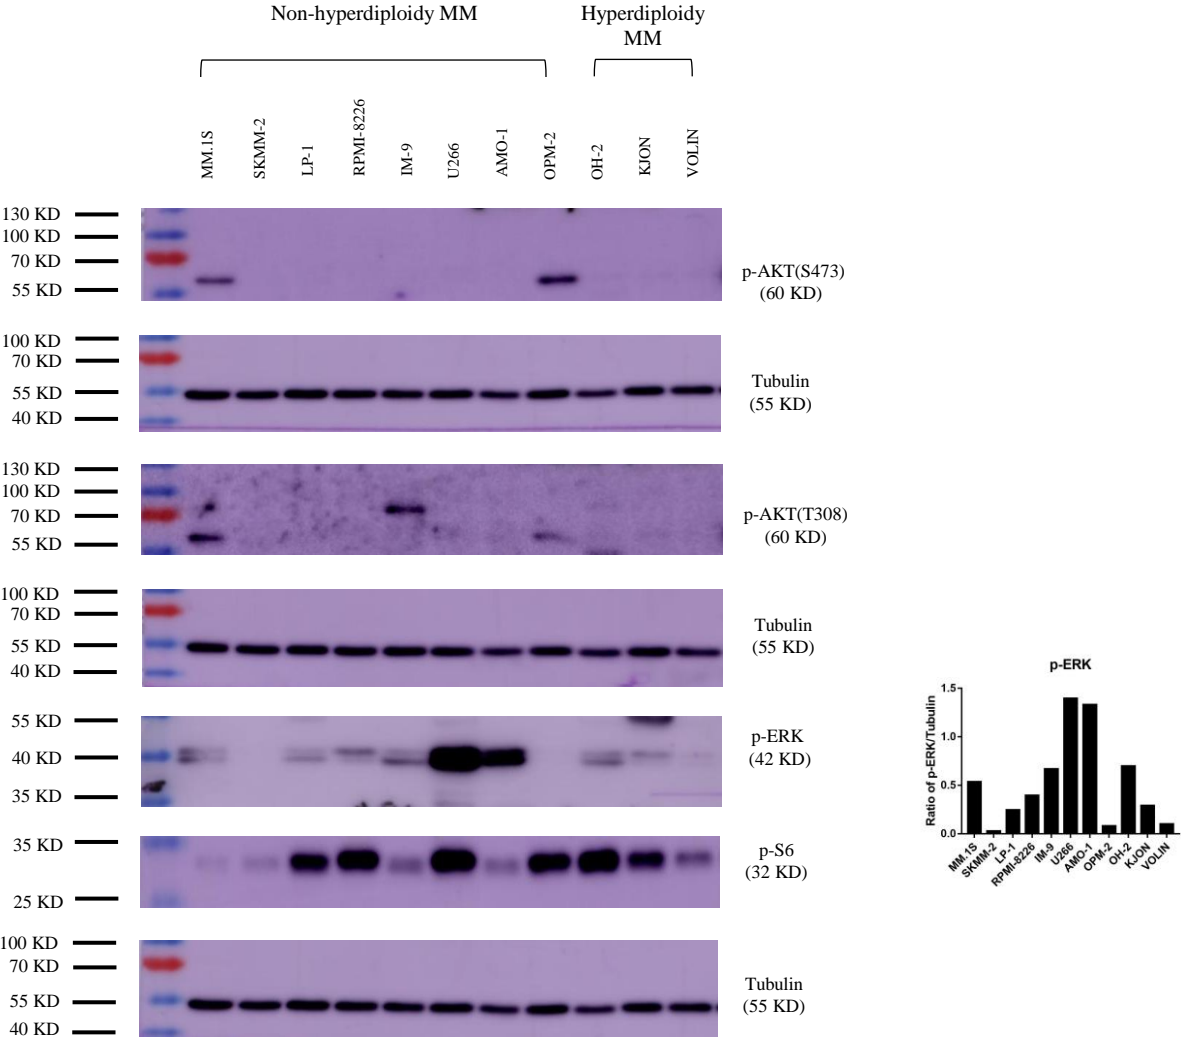

**Figure S9.** Original Western Blots for Figure 3A. Protein band densitometric analysis was performed by ImageJ software and is shown next to each blot.

Figure S10.

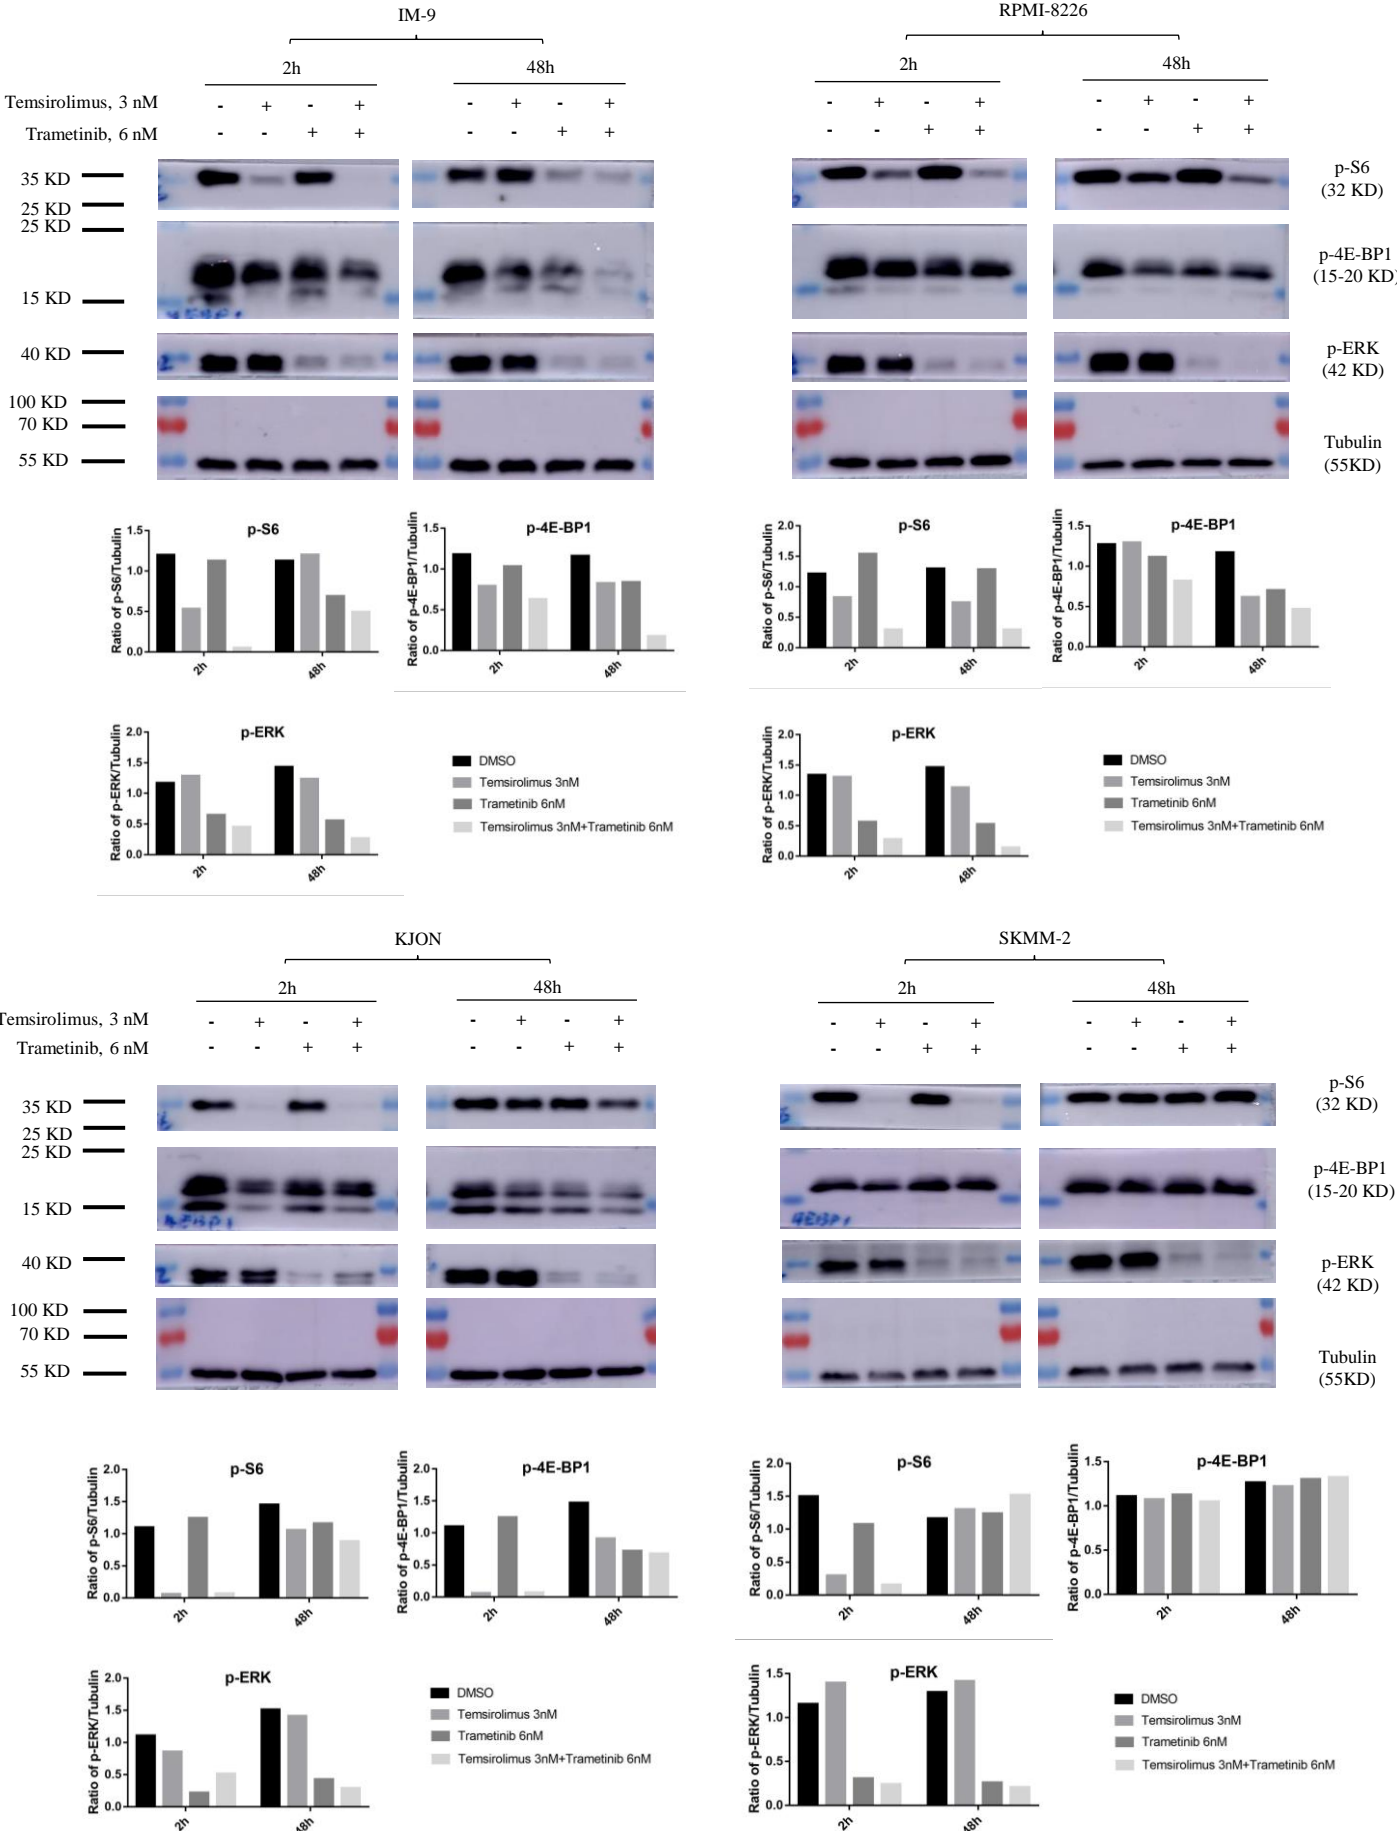

Figure S10. Original Western Blots for Figure 3E. Protein band densitometric analysis was performed by ImageJ software and is shown next to each blot.

**Table S1. MM cell lines based on cytogenetics**

| Cell line | Genetic aberrations                                                                    | Prognosis of cytogenetic alteration among MM patients |
|-----------|----------------------------------------------------------------------------------------|-------------------------------------------------------|
| MM.1S     | t 14;16 ( <i>c-Maf</i> ) ; 1q21 ( <i>CSK1B</i> ) gain [33]                             | Poor                                                  |
| SKMM-2    | del17p ( <i>TP53</i> ); t 11; 14 ( <i>CCND1</i> ) [33]                                 | Poor                                                  |
| LP-1      | t 4;14 ( <i>MMSET/FGFR3</i> ); 1q21 ( <i>CSK1B</i> ) gain [33]                         | Poor                                                  |
| RPMI-8226 | t 14;16 ( <i>c-Maf</i> ) ; 1q21 ( <i>CSK1B</i> ) gain; del17p ( <i>TP53</i> ) [33]     | Poor                                                  |
| OPM-2     | t 4;14 ( <i>MMSET/FGFR3</i> ); 1q21 ( <i>CSK1B</i> ) gain; del17p ( <i>TP53</i> ) [33] | Poor                                                  |
| AMO-1     | 1q21 ( <i>CSK1B</i> ) gain; t 12; 14 ( <i>CCND2</i> ) [33]                             | Poor                                                  |
| U266      | t 11; 14 ( <i>CCND1</i> ) [33]                                                         | Intermediate                                          |
| IM-9      | B-lymphoblastoid cell line [32]                                                        | Good                                                  |
| OH-2      | hyperdiploidy chromosomes 3,7,15,19 and 21 [35]                                        | Good                                                  |
| KJON      | hyperdiploidy chromosomes 3,5,7,9,11,17 and 21 [34]                                    | Good                                                  |
| VOLIN     | hyperdiploidy chromosomes 3,5,7,9,11,17 and 21 [34]                                    | Good                                                  |

**References**

32. Pellat-Deceunynck C, Amiot M, Bataille R, van Riet I, van Camp B, Omede P, et al. Human myeloma cell lines as a tool for studying the biology of multiple myeloma: a reappraisal 18 years after. *Blood* **1995**;86(10),4001–4002.

33. Moreaux J, Klein B, Bataille R, Descamps G, Maïga S, Hose D, et al. A high-risk signature for patients with multiple myeloma established from the molecular classification of human myeloma cell lines. *Haematologica*. **2011**;96(4), 574.

34. Våtsveen, T.K.; Børset, M.; Dikic, A.; Tian, E.; Micci, F.; Lid, A.H.B.; Meza-Zepeda, L.A.; Coward, E.; Waage, A.; Sundan, A.; et al. VOLIN and KJON—Two novel hyperdiploid myeloma cell lines. *Genes Chromosomes Cancer* **2016**, 55, 890–901.

35. Våtsveen, T.K.; Tian, E.; Kresse, S.H.; Meza-Zepeda, L.A.; Gabrea, A.; Glebov, O.; Dai, H.Y.; Sundan, A.; Kuehl, W.M.; Børset, M. OH-2, a hyperdiploid myeloma cell line without an IGH translocation, has a complex translocation juxtaposing MYC near MAFB and the IGK locus. *Leuk. Res.* **2009**, 33, 1670–1677.



**Table S2. IC50 values of 11 MM cell lines for pictilisib, temsirolimus, and trametinib**

| Cell line | Prognosis of cytogenetic alteration among MM patients | IC50 of pictinisib (μM) | IC50 of temsirolimus (μM) | IC50 of trametinib (μM) |
|-----------|-------------------------------------------------------|-------------------------|---------------------------|-------------------------|
| MM.1S     | Poor                                                  | 0.51                    | 0.055                     | 0.86                    |
| SKMM-2    | Poor                                                  | 1.61                    | Not available             | Not available           |
| LP-1      | Poor                                                  | 5.24                    | 6.29                      | Not available           |
| RPMI-8226 | Poor                                                  | 16.63                   | 0.081                     | 0.015                   |
|           | Poor                                                  | 2.21                    | 0.0031                    | 0.093                   |
| AMO-1     | Poor                                                  | Not available           | Not available             | 1.9                     |
| U266      | Intermediate                                          | 4.43                    | 2.38                      | 0.022                   |
| IM-9      | Good                                                  | Not available           | 1.03                      | 0.045                   |
| OH-2      | Good                                                  | 1.4                     | 0.45                      | 0.002                   |
| KJON      | Good                                                  | 1.07                    | 0.15                      | 0.0042                  |
| VOLIN     | Good                                                  | 1.29                    | Not available             | 7905                    |
